# Supplementary material for: Bis(2-pyridylmethyl)amine-functionalized alizarin: an efficient and simple colorimetric sensor for fluoride and a fluorescence turn-on sensor for Al3+ in an organic solution
Source: Royal Society of Chemistry journal article supplement (doi:10.1039/c9dt00859d), 2019-01-01
Supplement: c9dt00859d1.pdf [file c9dt00859d1.pdf]

# Supplementary information

## **Bis(2-pyridylmethyl)amine functionalized alizarin: Efficient and simple colorimetric sensor for fluoride and fluorescence turn-on sensor for Al<sup>3+</sup> in organic solution**

Ling Zhu, Yue-Ling Bai, Yongmei Zhao, Feifei Xing, \* Ming-Xing Li and Shourong Zhu\*

Department of Chemistry, Shanghai University, Shanghai 200444, China

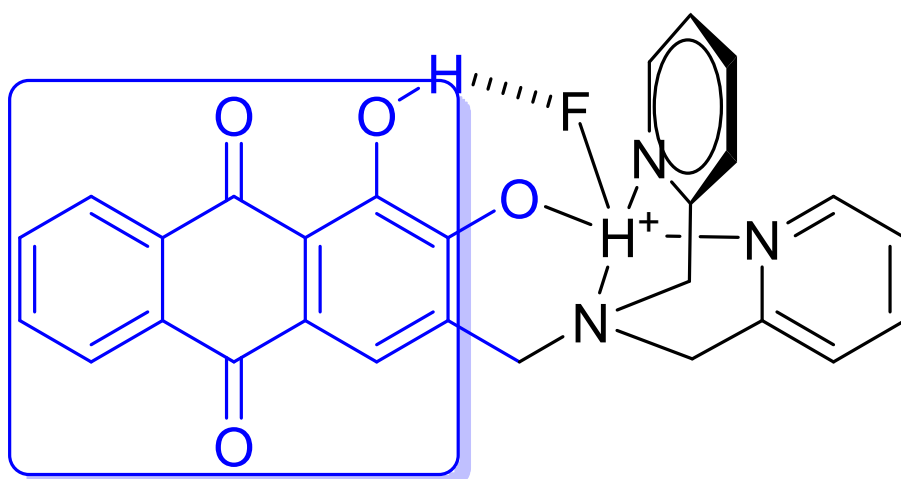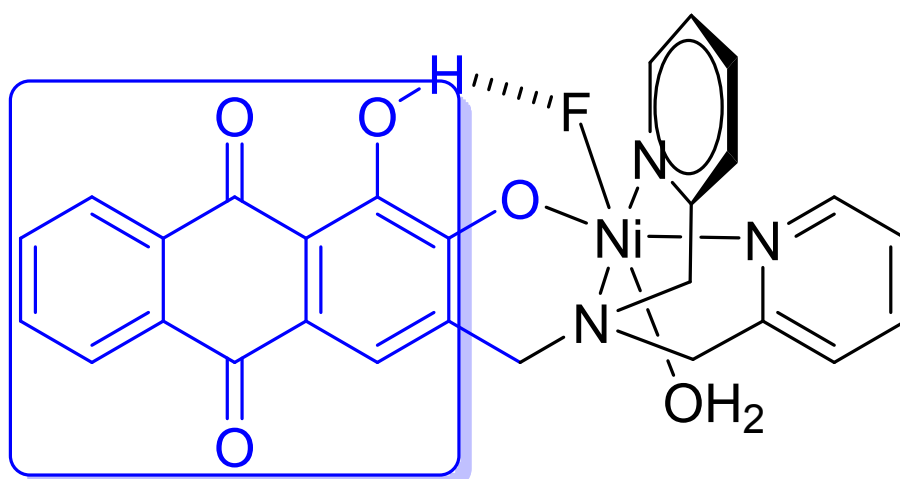

**Scheme S1.** Proposed structure of  $\text{H}_2\text{L}-\text{F}^-$  and  $\text{HL}^--\text{Ni}^{2+}-\text{F}^-$  complex.

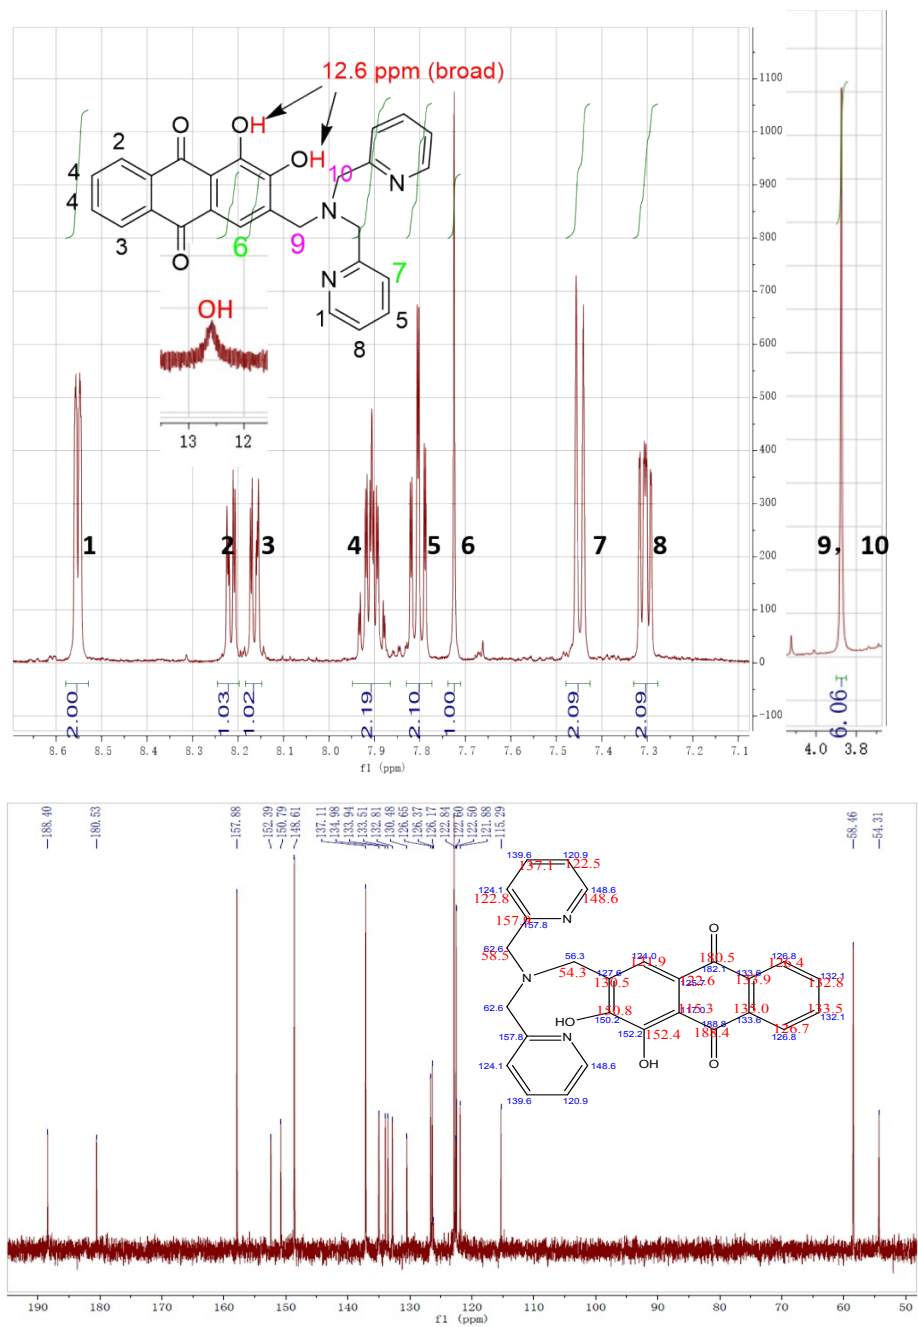

**Figure S1. <sup>1</sup>H and <sup>13</sup>C NMR spectra of H<sub>2</sub>L in (CD<sub>3</sub>)SO**

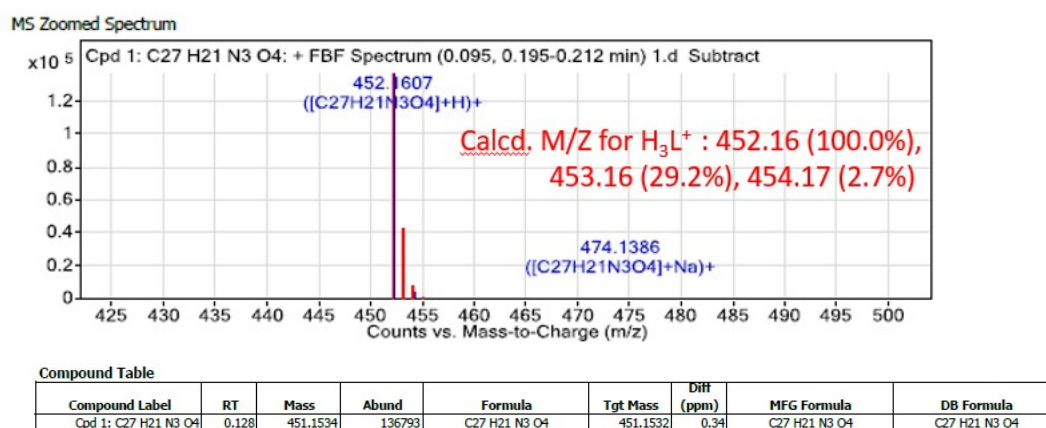

Figure S2. Mass spectral data for H<sub>2</sub>L in methanol

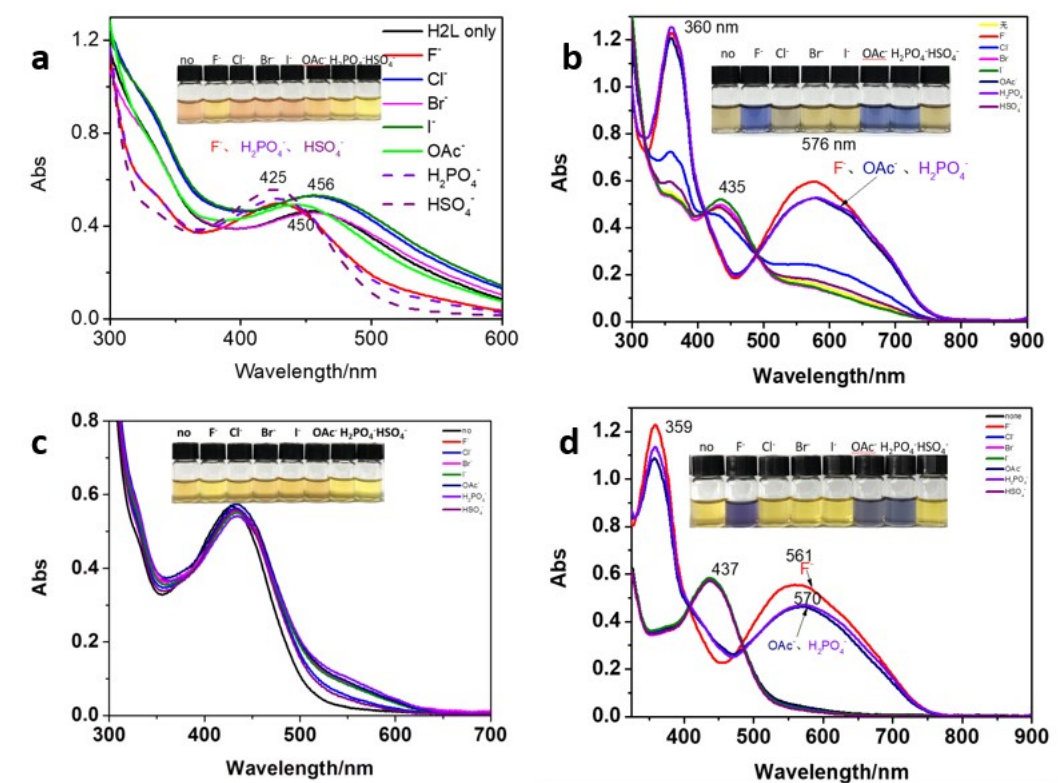

Figure S3. UV-Vis spectra of  $1.0 \times 10^{-4}$  M H<sub>2</sub>L in the absence and presence of  $5.0 \times 10^{-3}$  M different anions (TBA salt) in water(a), DMF(b), methanol(c), acetone(d).

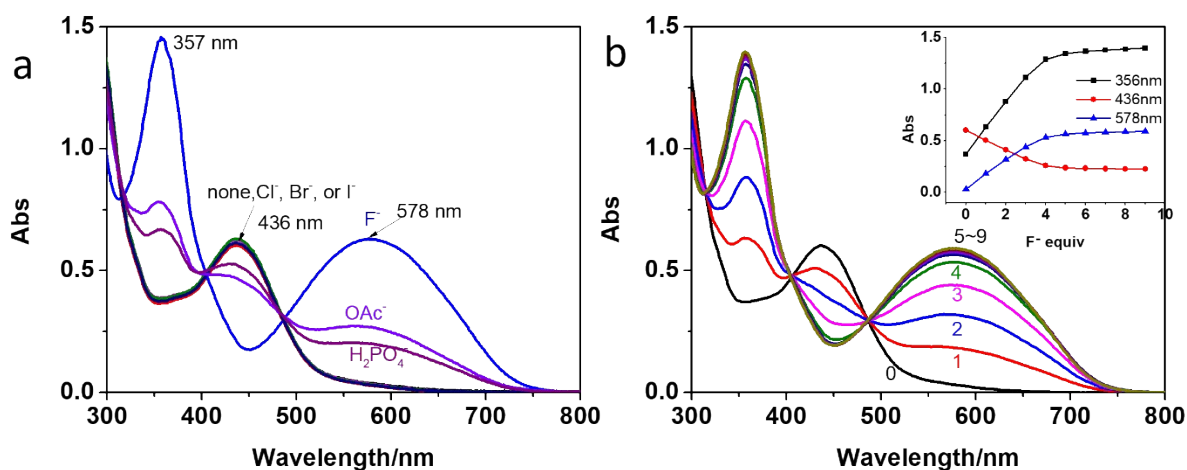

**Figure S4.** (a) UV-Vis spectra of  $1.0 \times 10^{-4}$  M  $H_2L$  in the absence and presence of  $5.0 \times 10^{-3}$  M different anions (TBA salt) in acetonitrile; (b) UV-vis spectral changes of  $1.0 \times 10^{-4}$  M  $H_2L$  upon gradually addition of 0 ~ 9 equiv of  $F^-$  in acetonitrile. The inset is a plot of 356, 436 and 578 nm absorbance vs  $F^-$  eqs.

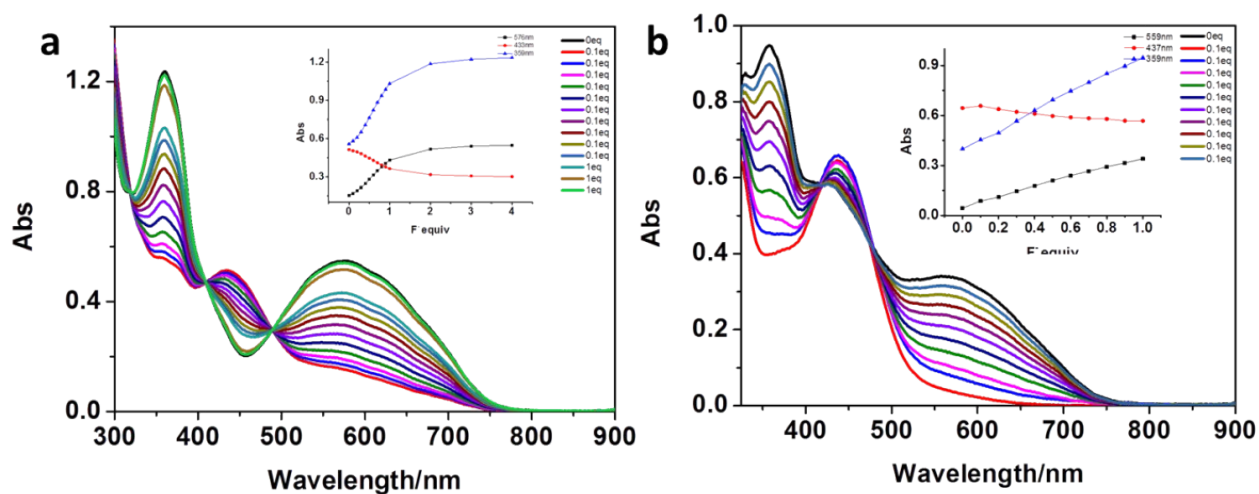

**Figure S5.** (a) UV-vis spectral changes of  $1.0 \times 10^{-4}$  M  $H_2L$  upon gradually addition of 0 ~ 4 equiv of TBAF in DMF. (b) UV-vis spectral changes of  $1.0 \times 10^{-4}$  M  $H_2L$  upon gradually addition of 0 ~ 1 equiv of TBAF in acetone.

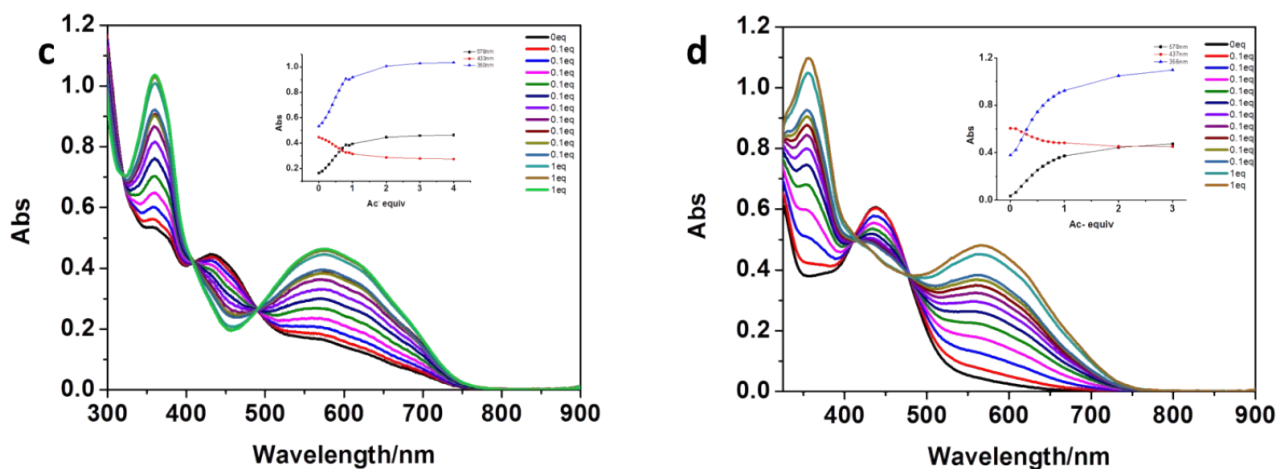

**Figure S6.** (a) UV-vis spectral changes of  $1.0 \times 10^{-4}$  M  $H_2L$  upon gradually addition of 0~4 equiv of  $Ac^-$  in DMF. (b) UV-vis spectral changes of  $1.0 \times 10^{-4}$  M  $H_2L$  upon gradually addition of 0~3 equiv of  $Ac^-$  in acetone (TBA salt).

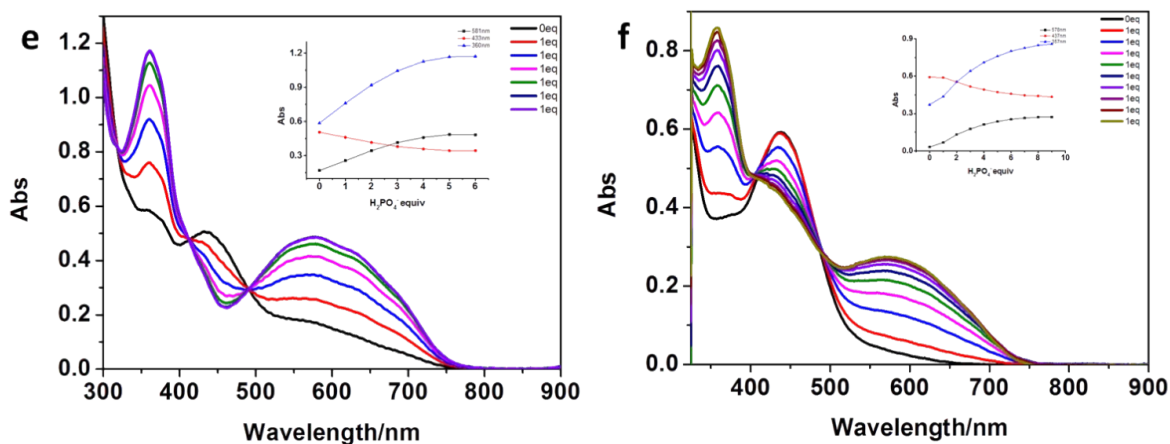

**Figure S7.** (a) UV-vis spectral changes of  $1.0 \times 10^{-4}$  M  $H_2L$  upon gradually addition of 0~6 equiv of  $H_2PO_4^-$  in DMF. (b) UV-vis spectral changes of  $1.0 \times 10^{-4}$  M  $H_2L$  upon gradually addition of 0~10 equiv of  $H_2PO_4^-$  in acetone.

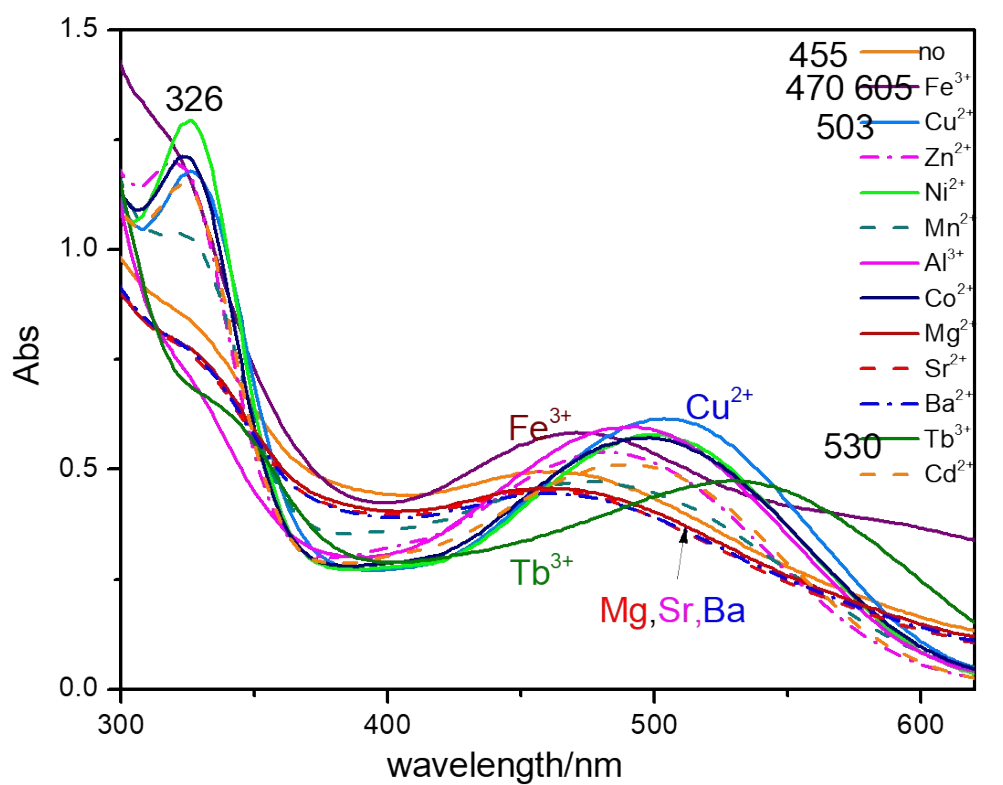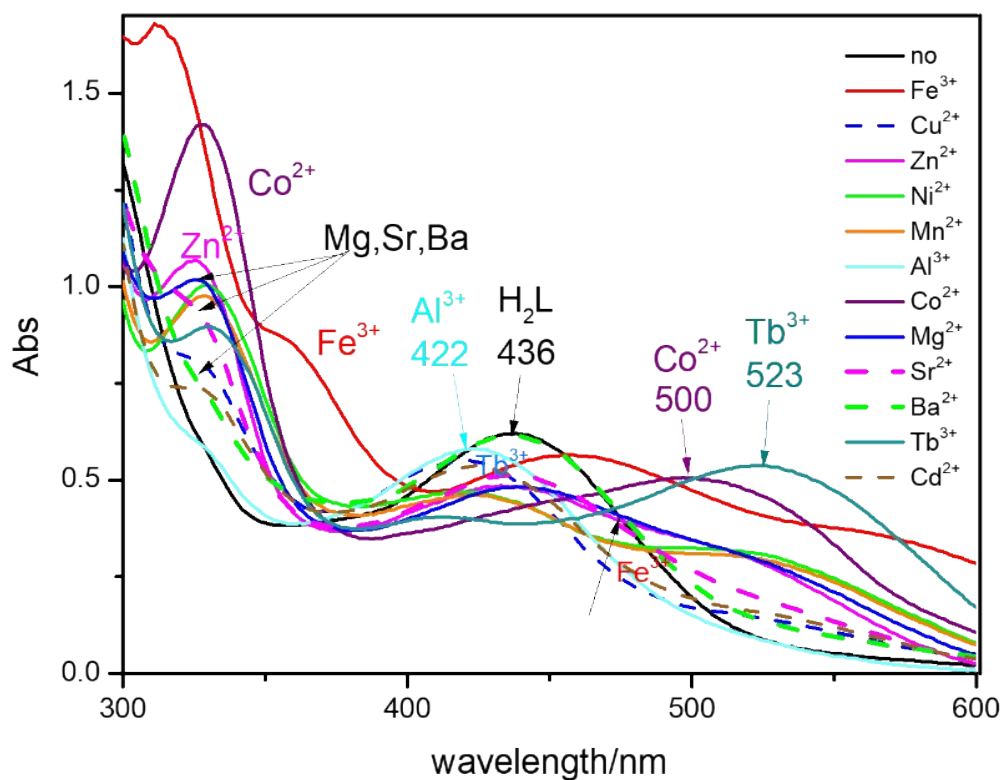

**Figure S8.** UV-vis spectral of  $1.0 \times 10^{-4}$  M  $H_2L$  in the absence (none) and presence of different metal ion ( $1.0 \times 10^{-4}$ ) in water (top) and acetonitrile (bottom).

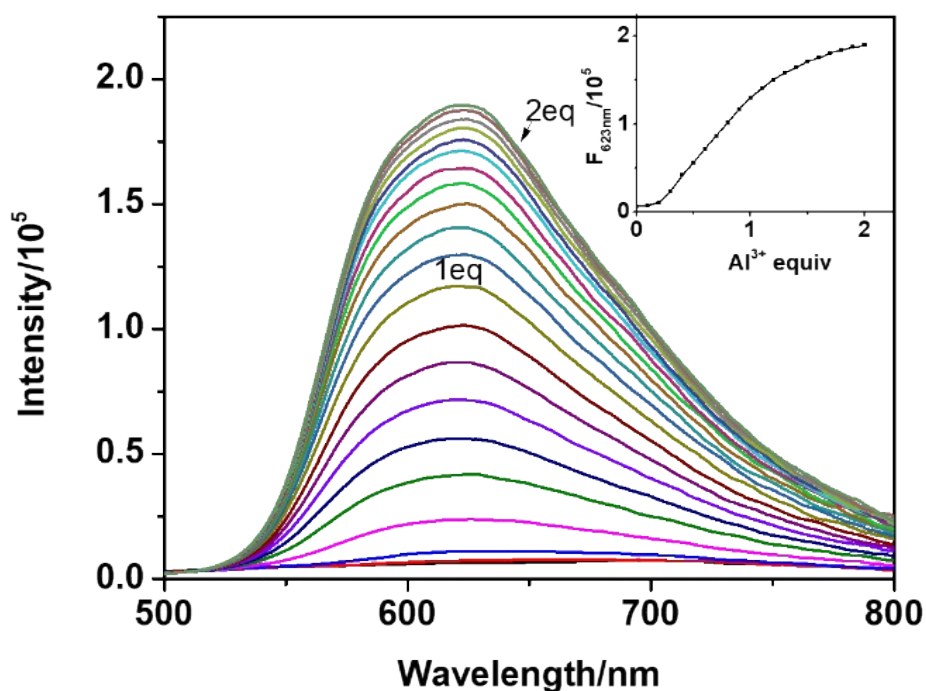

Figure S9. Fluorescence spectra of  $1.0 \times 10^{-4}$  M  $H_2L$  in the presence of  $2.0 \times 10^{-4}$  M  $AlCl_3$  in DMF (slid width 2 nm)

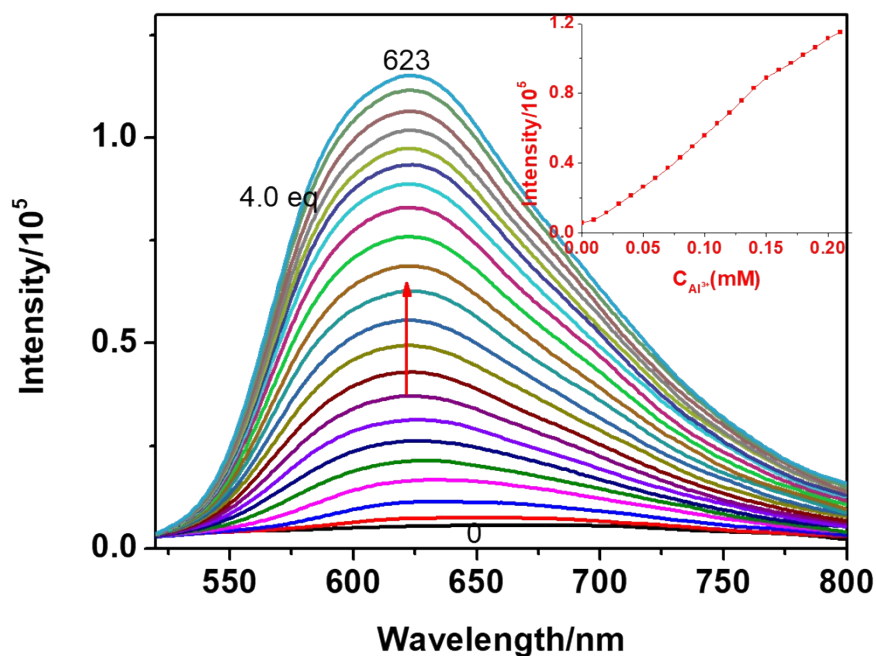

Figure S10. Fluorescent titration of  $H_2L$  ( $5.0 \times 10^{-5}$  M) in the presence of different concentrations of  $AlCl_3$  in DMF. Inset: the fluorescence at 623 nm of  $H_2L$  as a function of the  $AlCl_3$  concentration.  $\lambda_{ex} = 430$  nm, slid width 3 nm.



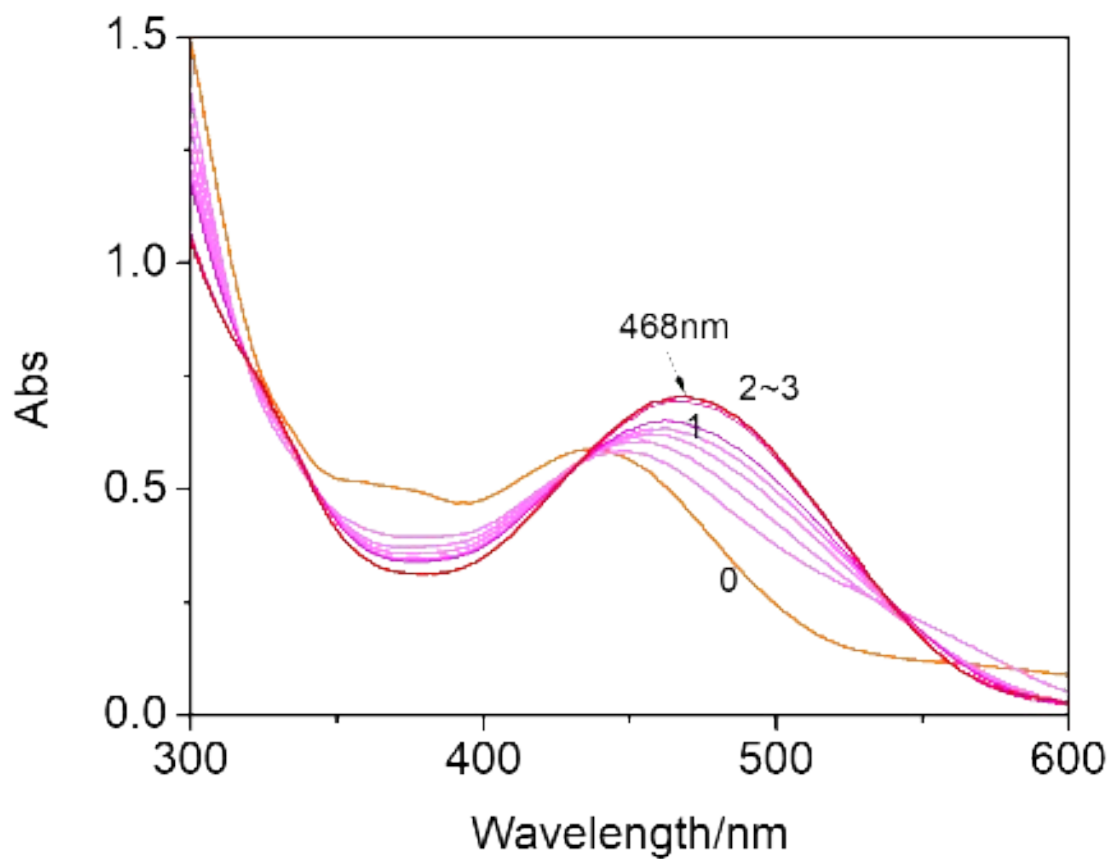

Fig. S11 NaOH titration spectra of  $1.0 \times 10^{-4}$  M  $H_2L$  in the presence of 1 eq  $Al(NO_3)_3$  in DMF.

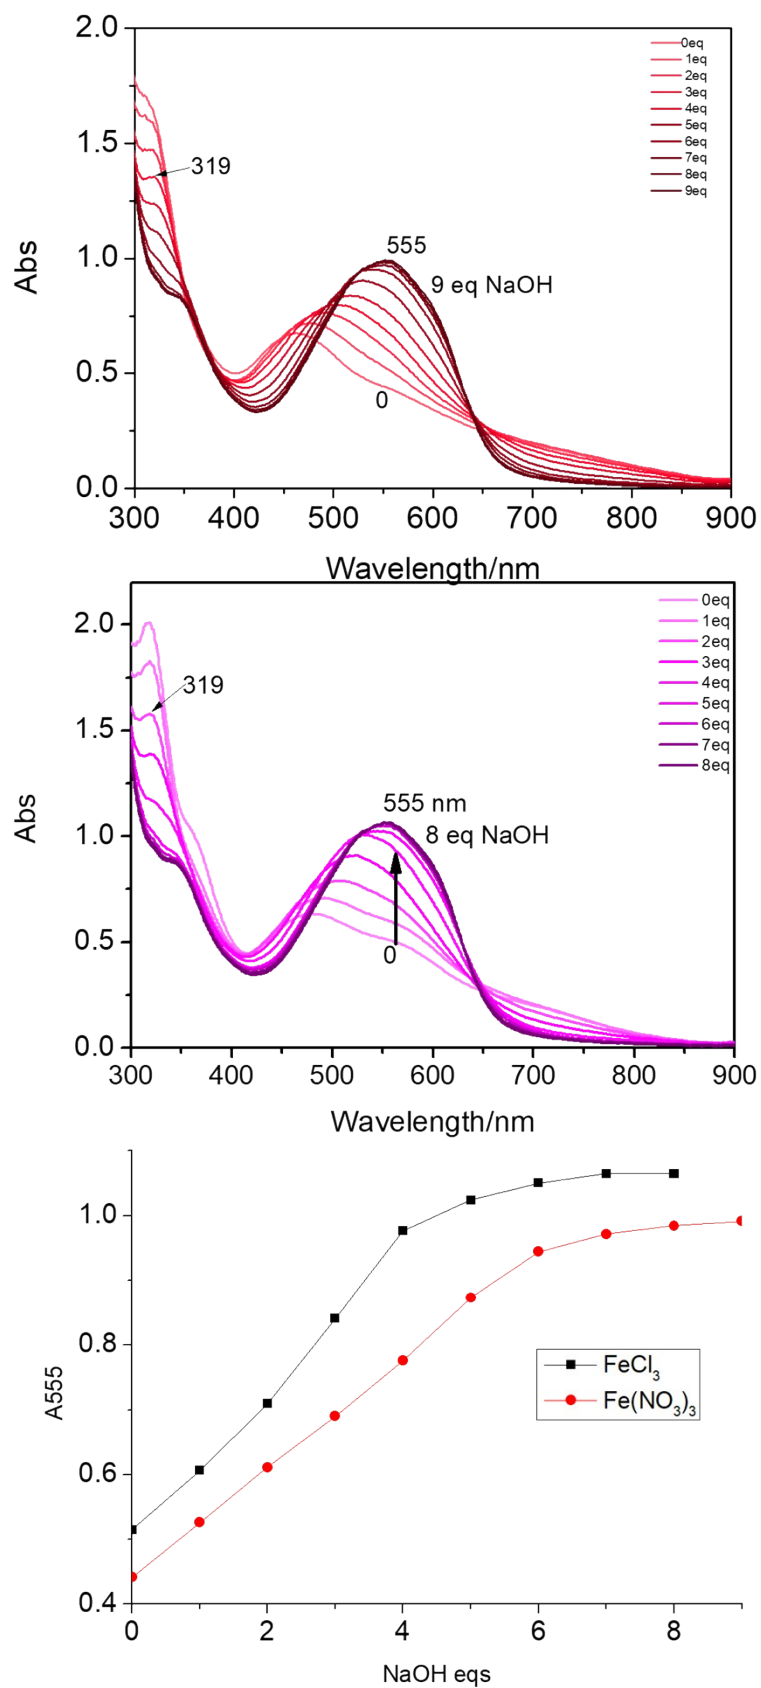

Figure S12. NaOH titration spectra of  $1.0 \times 10^{-4}$  M  $H_2L$  in the presence of 1 eq  $Fe(NO_3)_3$  (top),  $FeCl_3$  (middle) and their  $A_{552}$  vs NaOH eqs (bottom) in DMF.

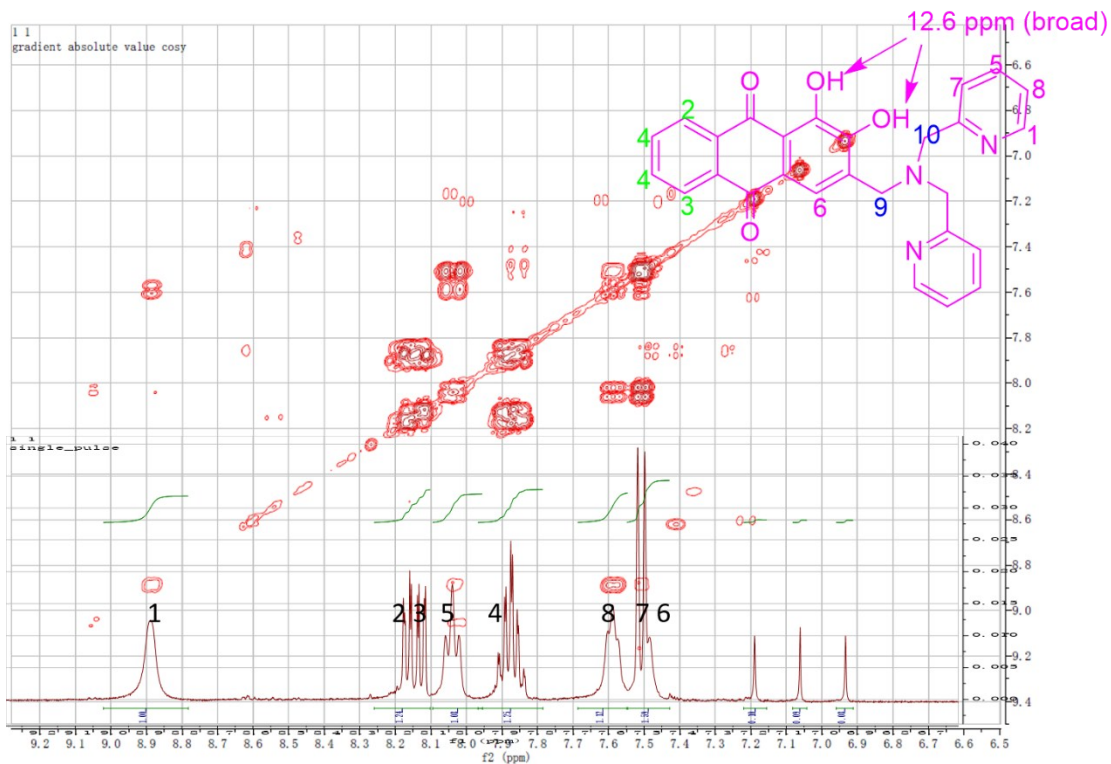

Figure S13. H-H Cosy of  $\sim 1 \times 10^{-2}$  M  $\text{H}_2\text{L-ZnCl}_2$  in  $d_6$ -DMSO

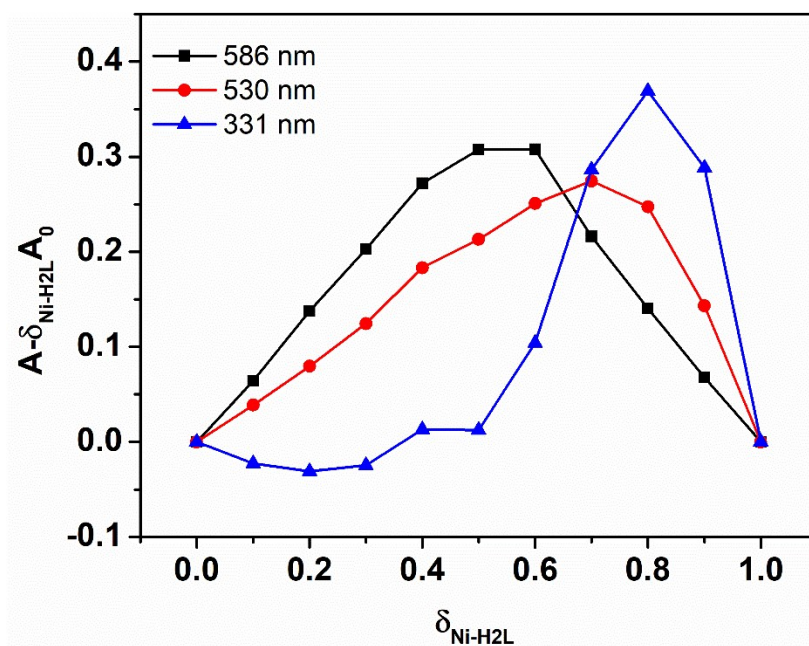

Figure S14. Jobs-plot of 331 nm (corresponding to  $\text{HL}^-$  species) and 586 nm (corresponding to  $\text{F}^- - \text{NiCl}_2 - \text{HL}^-$  species) for  $2.0 \times 10^{-4}$  M TBAF and  $2.0 \times 10^{-4}$  M  $\text{NiCl}_2 - \text{H}_2\text{L}$  system in acetonitrile.

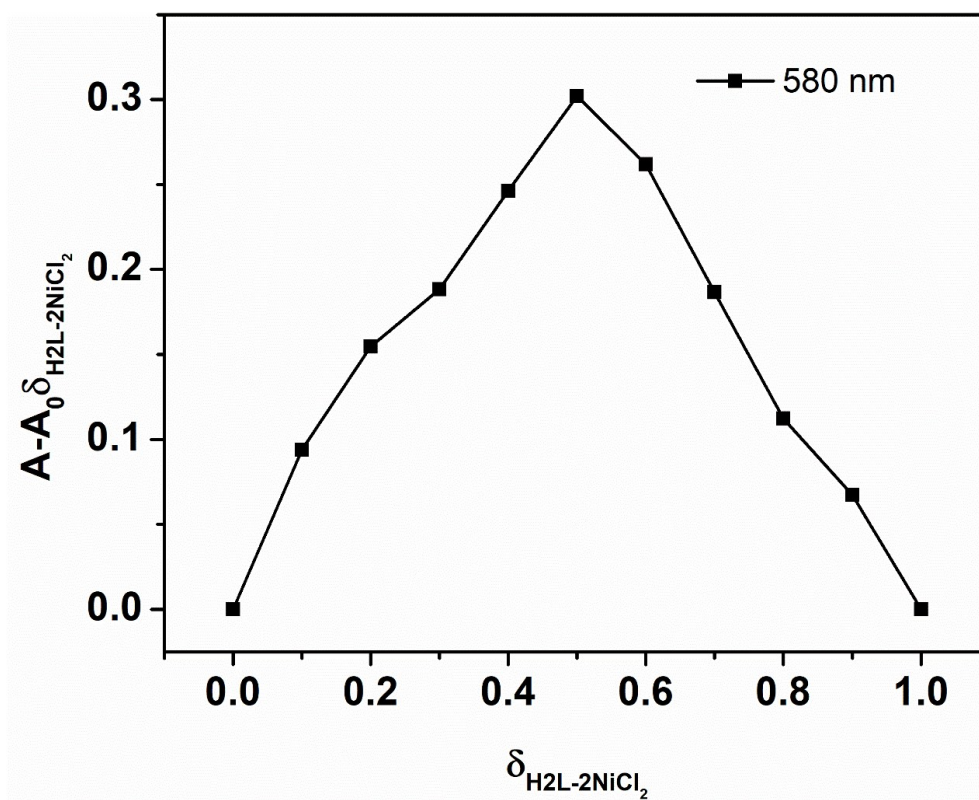

**Figure S15.** Jobs-plot of 580 nm (corresponding to  $\text{F}^-$ - $2\text{NiCl}_2$ - $\text{HL}^-$  species) for  $2.0 \times 10^{-4}$  M TBAF and  $2.0 \times 10^{-4}$  M  $\text{H}_2\text{L}-2\text{NiCl}_2$  system in acetonitrile.

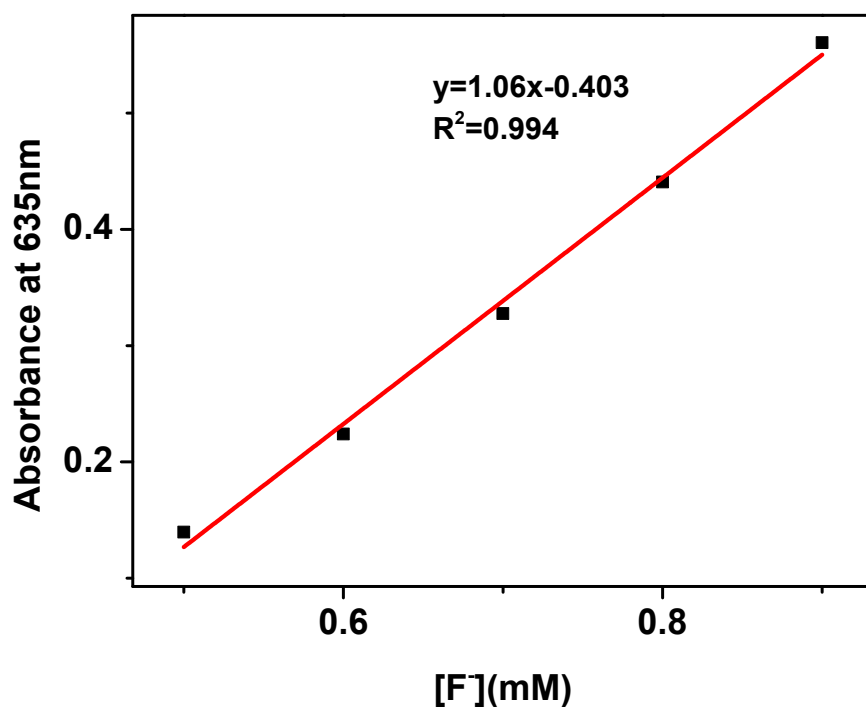

**Figure S16.** Plot of 635 nm absorbance at different  $F^-$  concentrations for  $1.0 \times 10^{-4} M$   $H_2L-2NiCl_2$  system.

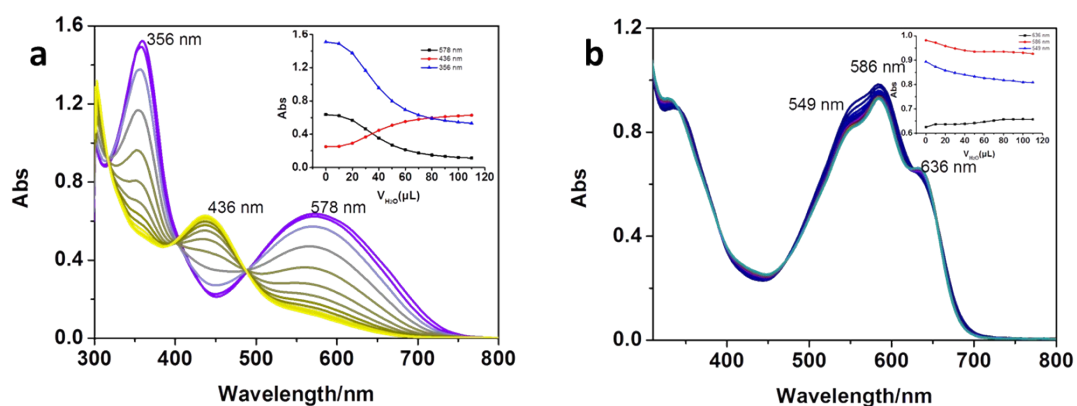

**Fig. S17** (a) UV-Vis spectra of  $1.0 \times 10^{-4} M$   $H_2L$  in the presence of  $1.0 \times 10^{-3} M$  TBAF (3.0 ml) upon gradually addition of 0 ~ 120  $\mu L$   $H_2O$  (0~4%) in acetonitrile; The inset is a plot of 356, 436 and 578 nm absorbance vs  $V_{H_2O}$  ( $\mu L$ ). (b) UV-Vis spectra of  $1.0 \times 10^{-4} M$   $NiCl_2-H_2L$  complex in the presence of  $1.0 \times 10^{-3} M$  TBAF (3.0 ml) upon gradually addition of 0 ~ 120  $\mu L$   $H_2O$  in acetonitrile;

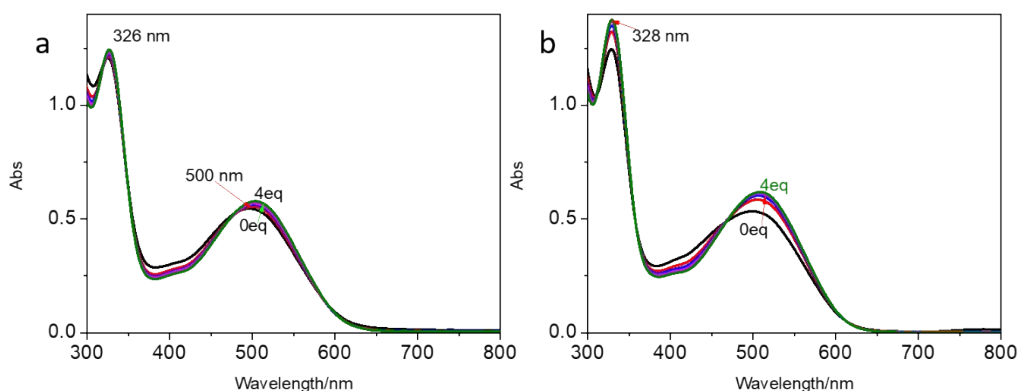

**Fig. S18** UV-Vis spectra of  $1.0 \times 10^{-4}$  M  $\text{H}_2\text{L-NiCl}_2$  in the presence of different eqs. of TBAF in  $\text{H}_2\text{O}$  (a) and 20% (V/V)  $\text{CH}_3\text{CN}$  aqueous solution (b).

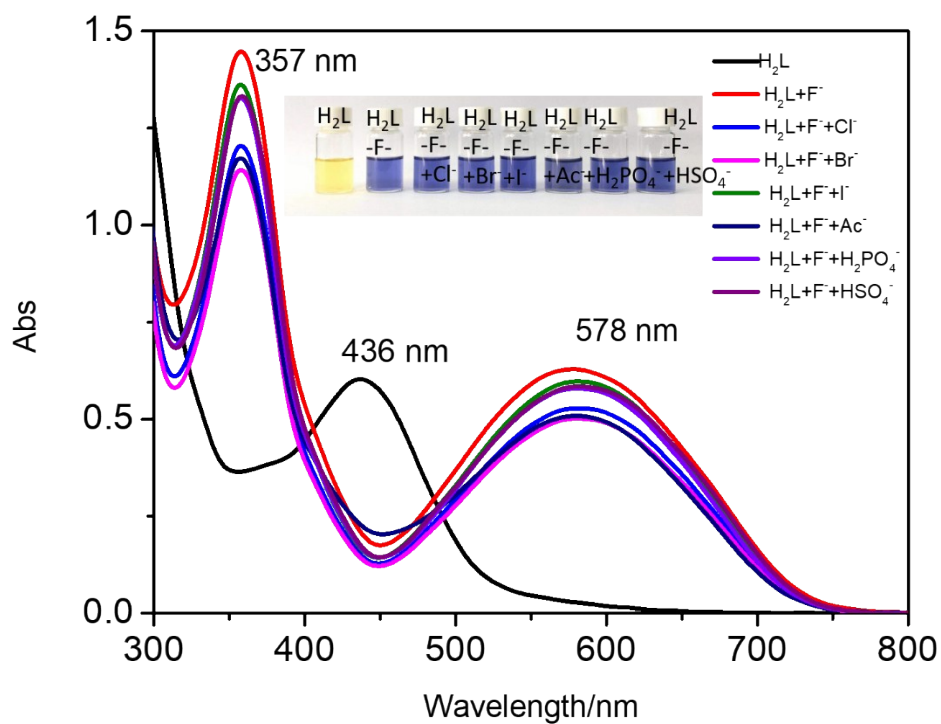

**Fig. S19** UV-Vis spectra of  $1.0 \times 10^{-4}$  M  $\text{H}_2\text{L}$  in the presence of  $5.0 \times 10^{-3}$  M  $\text{F}^-$  and  $5.0 \times 10^{-3}$  M other anions in  $\text{CH}_3\text{CN}$ . All are  $\text{TBA}^+$  salt. This figure indicates that 1 eq of  $\text{Cl}^-$ ,  $\text{Br}^-$ ,  $\text{I}^-$ ,  $\text{Ac}^-$ ,  $\text{H}_2\text{PO}_4^-$  and  $\text{HSO}_4^-$  have no significant influence on  $\text{F}^-$  sensitivity.

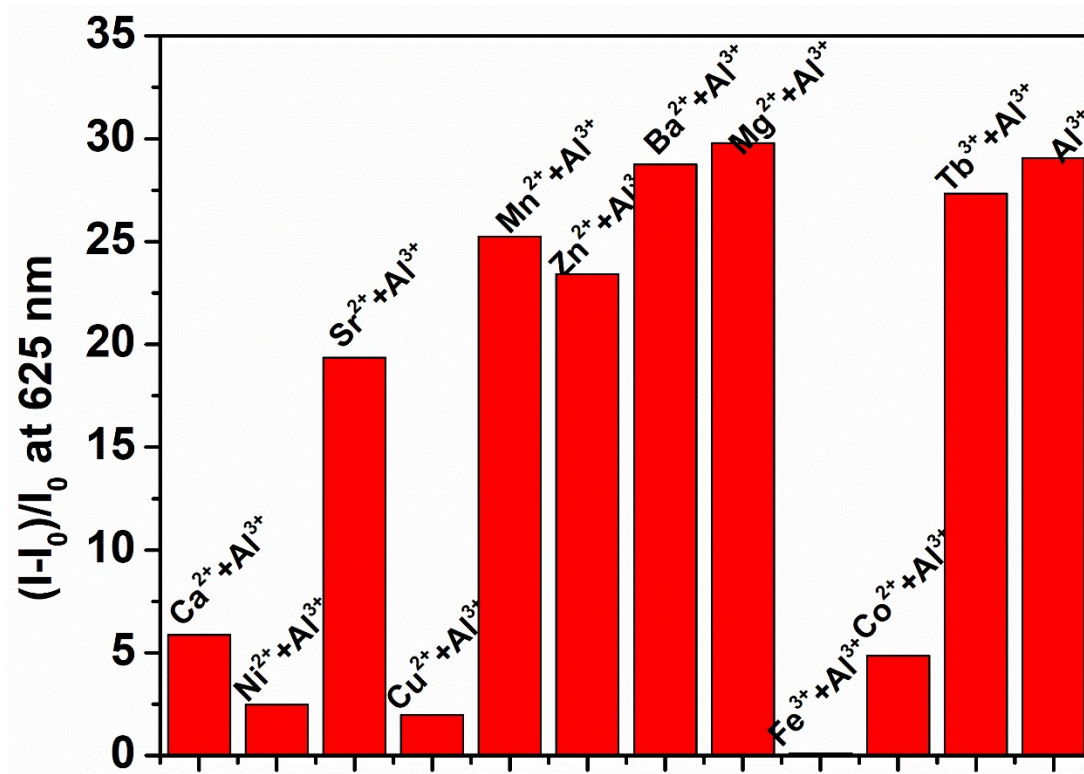

**Fig. S20** Relative fluorescence intensity of  $1.0 \times 10^{-4}$  M H<sub>2</sub>L in the presence of  $2.0 \times 10^{-4}$  M different metal ion chloride in DMF solution. Of the investigated metal ions, Fe<sup>3+</sup>, Cu<sup>2+</sup>, Ni<sup>2+</sup>, Co<sup>2+</sup> and Ca<sup>2+</sup> significantly decrease fluorescence intensity and thus greatly decrease Al<sup>3+</sup> fluorescence turn-on sensitivity.

**Table S1.** The limit of detection ( $3\sigma/\text{slope}$ ) for  $1.0 \times 10^{-4}$  M H<sub>2</sub>L in different solvents.

|                                             | Acetonitrile          | DMF                    | Acetone                |
|---------------------------------------------|-----------------------|------------------------|------------------------|
| F <sup>-</sup>                              | $7.54 \times 10^{-6}$ | $5.276 \times 10^{-6}$ | $3.067 \times 10^{-5}$ |
| Ac <sup>-</sup>                             | insensitive           | $7.666 \times 10^{-6}$ | $2.098 \times 10^{-5}$ |
| H <sub>2</sub> PO <sub>4</sub> <sup>-</sup> | insensitive           | $3.055 \times 10^{-5}$ | $2.021 \times 10^{-4}$ |
